# Supplementary material
Source: Royal Society of Chemistry journal article supplement (doi:10.1039/d6tc00404k)
Supplement: d6tc00404k1.pdf [file d6tc00404k1.pdf]

Supplementary Information (SI) for Journal of Materials Chemistry C.  
This journal is © The Royal Society of Chemistry 2025

Electronic Supplemental Information for  
**Controllable Synthesis and Lattice Vibration Anisotropy of 2D  
Sb<sub>2</sub>O<sub>3</sub> Single Crystals**

Lin Li,<sup>\*acd</sup> Yang Guo,<sup>bc</sup> Yuwen Sun,<sup>a</sup> Hui Wang,<sup>a</sup> Yongshuai Wang,<sup>bc</sup> Qing Zhang,<sup>\*bc</sup>  
Dechao Geng<sup>\*bc</sup>

<sup>a</sup> College of Chemistry, Tianjin Normal University, Tianjin 300387, China.

<sup>b</sup> State Key Laboratory of Advanced Materials for Intelligent Sensing, Ministry of  
Science and Technology & Key Laboratory of Organic Integrated Circuit, Ministry of  
Education & Tianjin Key Laboratory of Molecular Optoelectronic Sciences,  
Department of Chemistry, School of Science, Tianjin University, Tianjin 300072, China.  
Collaborative Innovation Center of Chemical Science and Engineering, Tianjin  
300072, P. R. China.

<sup>c</sup> Beijing National Laboratory for Molecular Sciences, Beijing 100190, China

<sup>d</sup> Key Laboratory of Advanced Intelligent Protective Equipment Technology (Hebei  
University of Technology), Ministry of Education, Tianjin, 300401, P.R. China

\*E-mail address: [linli2023@tjnu.edu.cn](mailto:linli2023@tjnu.edu.cn); [zhangqing161@tju.edu.cn](mailto:zhangqing161@tju.edu.cn);

[gengdechao\\_1987@tju.edu.cn](mailto:gengdechao_1987@tju.edu.cn)

## **Experimental Section**

### **Synthesis of Sb<sub>2</sub>O<sub>3</sub> monolayers**

Two-dimensional Sb<sub>2</sub>O<sub>3</sub> nanosheets were prepared using the microspacing sublimation method. First, Sb<sub>2</sub>O<sub>3</sub> powder and NaCl particles were uniformly mixed and ground at a weight ratio of 2:1 to serve as the precursor for growth. Then, the growth hot stage was heated. When the temperature of the hot stage rose to ~500 °C, a piece of glass was taken, and a small amount of the precursor was scattered in the center of the glass. The glass was then transferred to the center of the hot stage. Next, a freshly cleaved mica substrate was placed above the precursor powder, maintaining a spacing of either 1–3 mm or 300–1000 μm between the mica substrate and the precursor. The aforementioned setup was heated for 5–10 minutes. Subsequently, the mica substrate was removed from the hot stage and transferred under an optical microscope for observation, where the formed Sb<sub>2</sub>O<sub>3</sub> nanosheets could be found on the mica substrate. It should be noted that the Sb<sub>2</sub>O<sub>3</sub> nanosheets become thicker and larger with increasing growth temperature and extended growth time. Therefore, by adjusting the growth temperature and time, Sb<sub>2</sub>O<sub>3</sub> nanosheets of different sizes and thicknesses can be obtained.

### **Transfer of materials**

The synthesized 2D Sb<sub>2</sub>O<sub>3</sub> flakes were transferred using a wet transfer method, with the commonly used Poly(methyl methacrylate) (PMMA) serving as the supporting layer. The Sb<sub>2</sub>O<sub>3</sub> flakes were transferred from the mica substrate to either a SiO<sub>2</sub>/Si substrate or a TEM copper grid for further characterization and testing. During the transfer process, a layer of PMMA was first spin-coated onto the prepared material at

a speed of 2000 rpm for 1 minute to form a uniform PMMA supporting layer. Next, the PMMA/ $\alpha$ -Sb<sub>2</sub>O<sub>3</sub>/mica stack was placed on a heating stage and heated at 160°C for 10 minutes to solidify the PMMA and enhance its adhesion to the Sb<sub>2</sub>O<sub>3</sub> layer. The stack was then immersed in deionized water at 70°C for 1 hour. Due to the hydrophobic nature of mica, the PMMA/Sb<sub>2</sub>O<sub>3</sub> film tended to detach from the mica substrate in the deionized water. After immersion, the PMMA film was gently lifted with tweezers, separating the PMMA/Sb<sub>2</sub>O<sub>3</sub> film from the mica substrate, leaving the PMMA/Sb<sub>2</sub>O<sub>3</sub> membrane floating on the water surface. Subsequently, the target substrate (SiO<sub>2</sub>/Si or TEM copper grid) was carefully dipped into the water to retrieve the PMMA/Sb<sub>2</sub>O<sub>3</sub> film. The sample was then heated at 160°C for 10 minutes and further annealed in a vacuum oven at 60°C for 3 hours to strengthen the interaction between the sample and the target substrate. Finally, the sample was immersed in acetone and heated at 60°C for 5 minutes to remove the PMMA, completing the transfer of the sample to the target substrate.

### **Materials Characterization**

The morphology, grain size, and thickness of 2D  $\alpha$ -Sb<sub>2</sub>O<sub>3</sub> flakes were characterized using a 3D laser confocal microscope (KEYENCE, VK-X1000) and an atomic force microscope (AFM) (Dimension, ICON-PT). Raman spectroscopy and angle-resolved polarized Raman spectroscopy measurements were performed on the samples using a Raman spectrometer (Horiba, iHR550+Smart Raman) with an excitation wavelength of 532 nm. The crystal phases and crystallinity of the crystals were analyzed by X-ray diffraction (XRD) (smartlab9), and the elemental composition of the Sb<sub>2</sub>O<sub>3</sub> crystals was

analyzed by X-ray photoelectron spectroscopy (XPS) (ULVAC-PHI INC). The atomic structure of  $\text{Sb}_2\text{O}_3$  was investigated by transmission electron microscopy (TEM) (Thermo Scientific Talos F200X). The bandgap of the samples was measured using ultraviolet-visible absorbance spectroscopy (UV-Vis).

## Supporting Figures

**Table S1** Quantitative analysis of EDS spectra for  $\text{Sb}_2\text{O}_3$  crystals.

| Element | Mass fraction (%) | Atomic fraction (%) |
|---------|-------------------|---------------------|
| Sb      | 83.42             | 39.79               |
| O       | 16.58             | 60.21               |

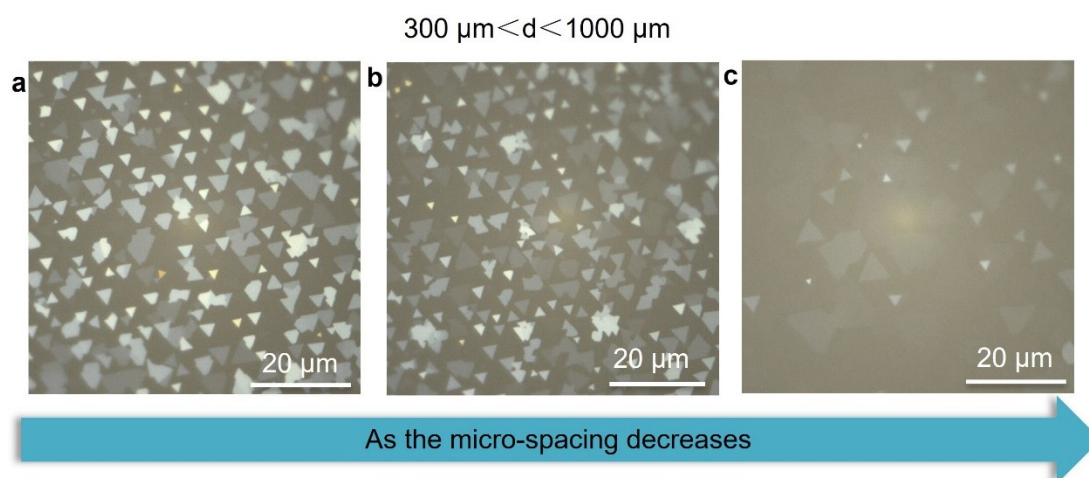

**Fig. S1.** (a-c) Optical images of  $\text{Sb}_2\text{O}_3$  crystals prepared under different micro-spacing conditions.

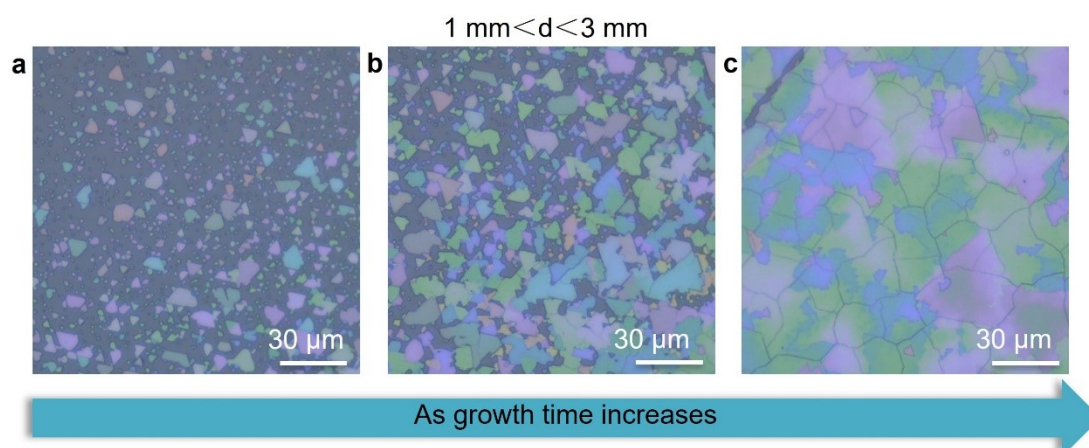

**Fig. S2.** (a-c) Optical images of  $\text{Sb}_2\text{O}_3$  crystals prepared under different growth times.

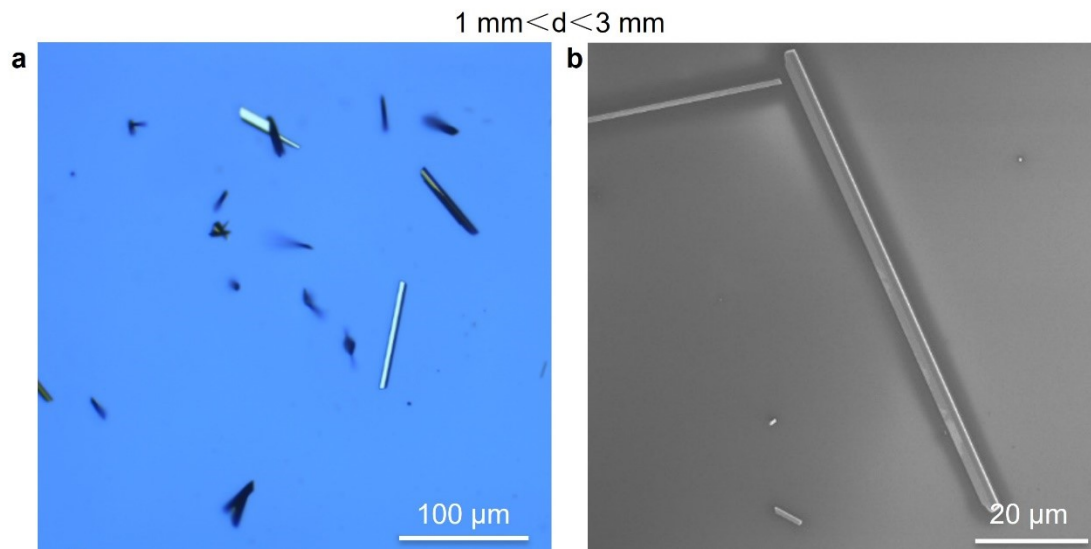

**Fig. S3.** (a) Optical image of the rod-shaped  $\text{Sb}_2\text{O}_3$  crystal. (b) Scanning electron microscope image of the rod-shaped  $\text{Sb}_2\text{O}_3$  crystal.

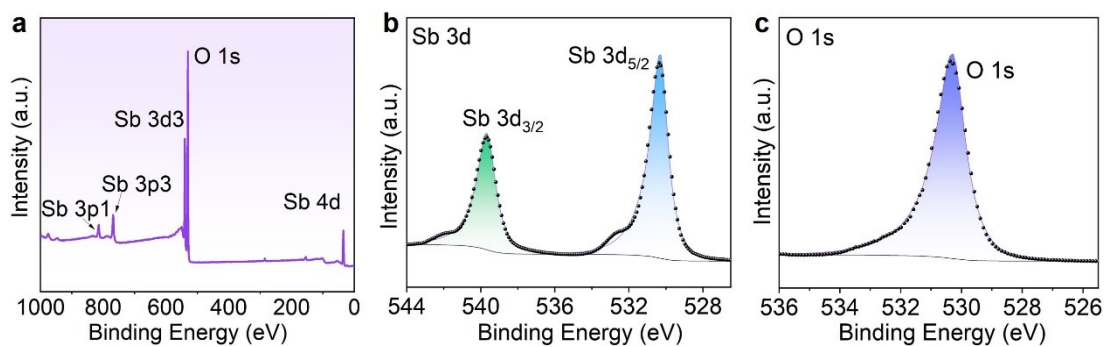

**Fig. S4.** XPS spectra of  $\text{Sb}_2\text{O}_3$  powders. (a) Full XPS spectrum of  $\text{Sb}_2\text{O}_3$  powders. (b) XPS spectra of  $\text{Sb}_2\text{O}_3$  powders for Sb 3d. (c) XPS spectra of  $\text{Sb}_2\text{O}_3$  powders for O 1s.

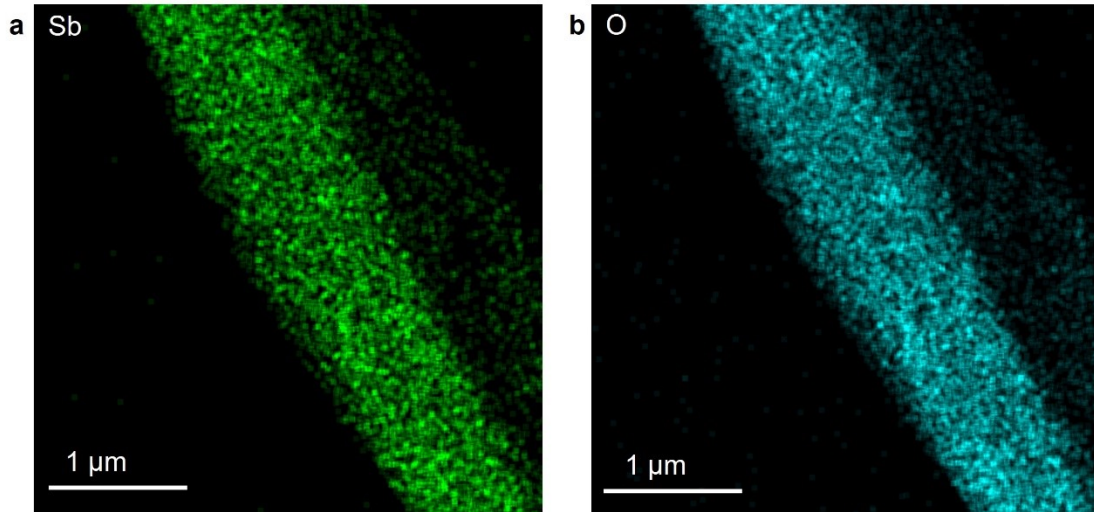

**Fig. S5.** (a-b) EDS images of rod-shaped  $\text{Sb}_2\text{O}_3$  crystals, The uniform distribution of Sb and O elements is shown.

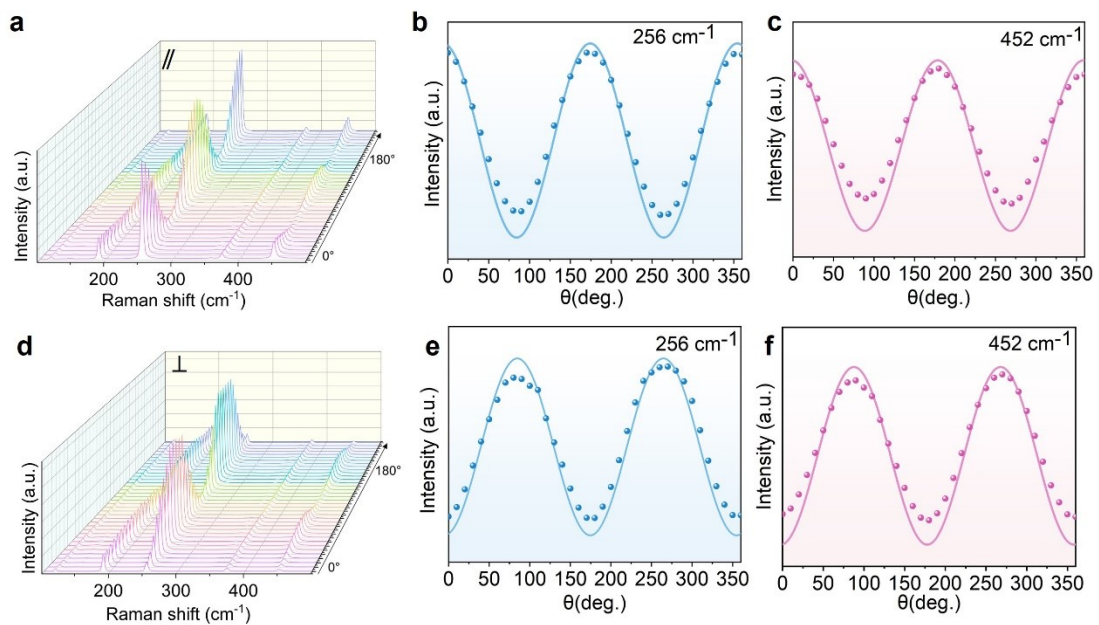

**Fig. S6.** (a, d) Polarizing Raman spectral waterfall diagram of  $\text{Sb}_2\text{O}_3$  in parallel configurations and cross configuration. (b-c) Data plot of angular variation of Raman scattering intensity under parallel polarization configuration. (e-f) Data plot of the variation of Raman scattering intensity with angle in cross polarization configuration. Points are experimental data and curves are formula fitting curves.

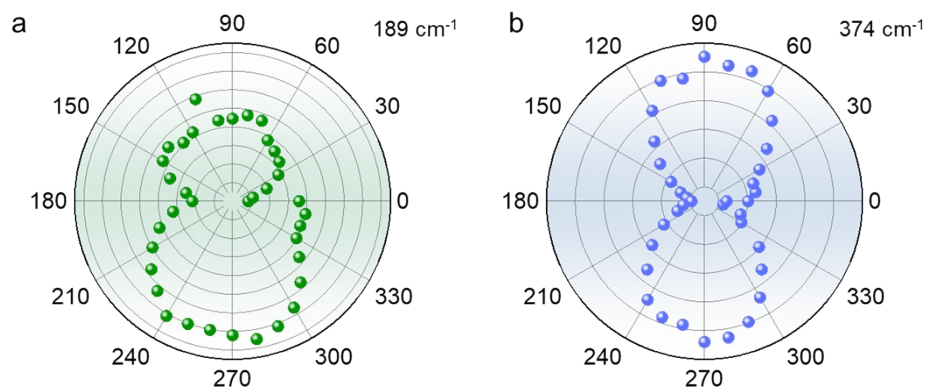

**Fig. S7.** Polar coordinates of Raman peak intensity at 189 cm<sup>-1</sup> and 374 cm<sup>-1</sup> in the cross-polarization configuration.
